# Supplementary material for: Experimental evidence shows minor contribution of nitrogen deposition to global forest carbon sequestration
Source: PubMed Central journal article supplement — Glob Chang Biol. 2021 Nov 20;28(3):899–917. doi: 10.1111/gcb.15960 (PMC9299138; doi:10.1111/gcb.15960), 2021-11-20
Supplement: GCB-28-899-s001.pdf [file GCB-28-899-s001.pdf]

## **SUPPORTING INFORMATION**

### **Experimental evidence shows minor contribution of nitrogen deposition to global forest carbon sequestration**

L.F. Schulte-Uebbing, G.H. Ros and W. de Vries

This file contains:

- Supplementary Figures S1–S8
- Supplementary Tables S1–S5

## Supplementary Figures

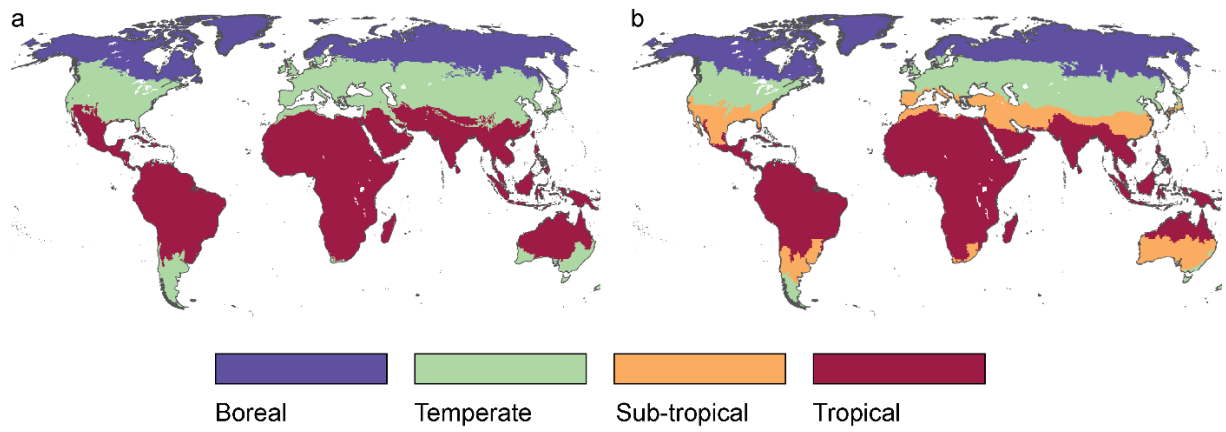

**Figure S1 (a)** Used biome delineation (based on a combination of WWF ecoregions and FAO Global Ecological zones (GEZ), **(b)** global biomes according to FAO GEZ (FAO, 2012).

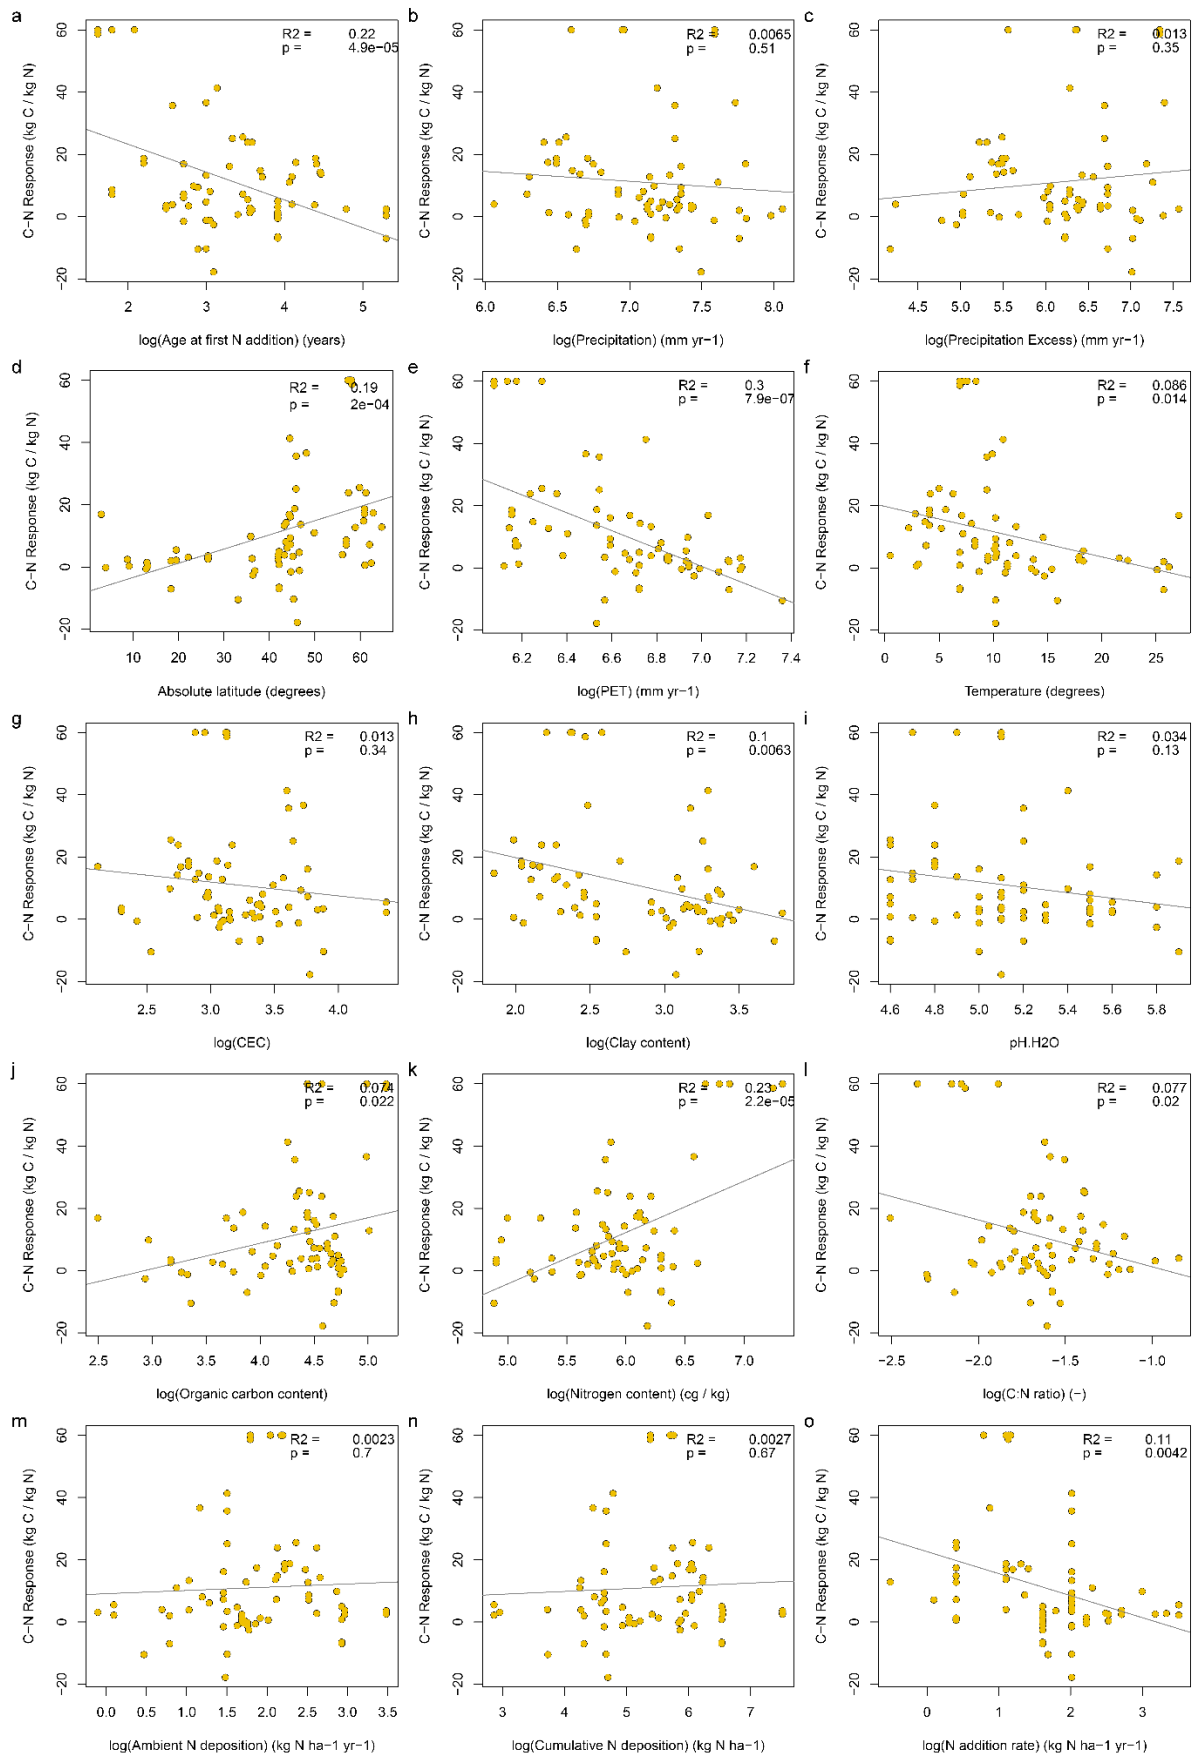

**Figure S2** Scatter plots showing linear regressions of predictor variables against C-N response. p values differ from those presented in Table S2 because (i) C-N response is not log-transformed for easier interpretation and no random structure is introduced.

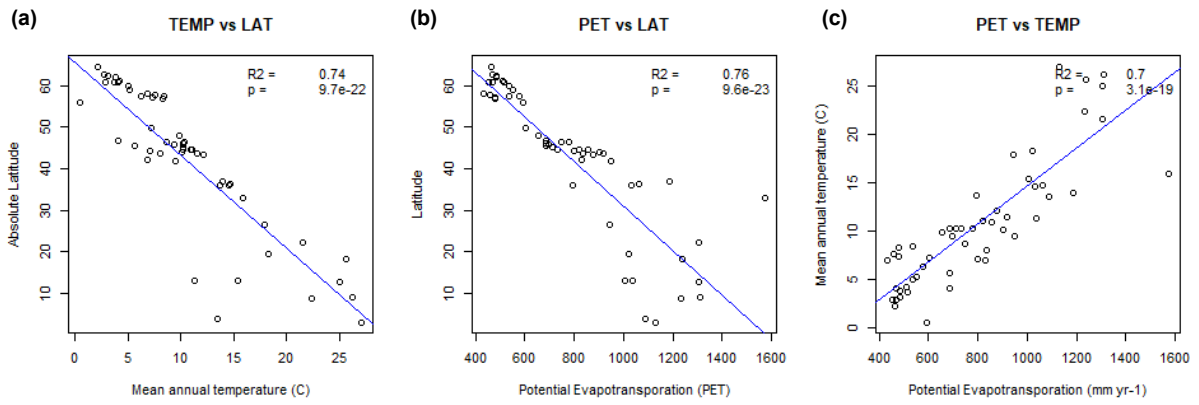

**Figure S3** Correlation between **a**, mean annual temperature and absolute latitude, **b**, absolute latitude and potential evapotranspiration, **c**, potential evapotranspiration and mean annual temperature in experimental locations. Each dot represents an experimental plot in the database.

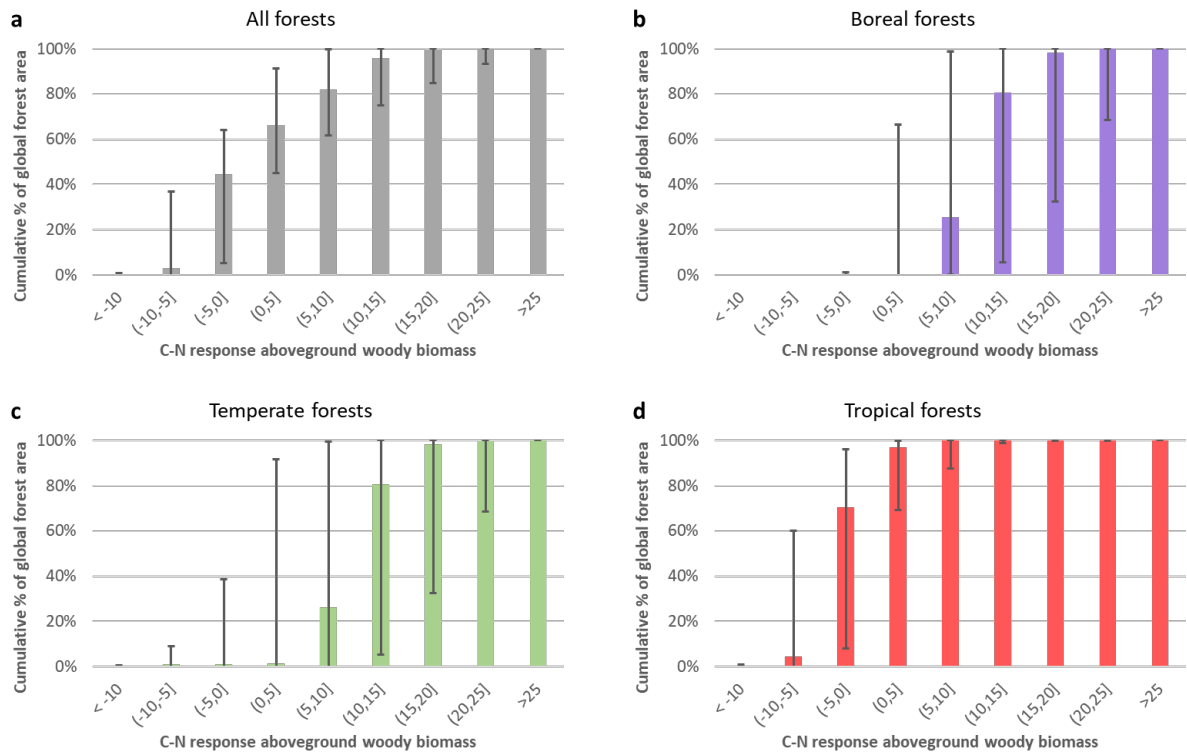

**Figure S4** Cumulative frequency histogram showing frequency of predicted mean C-N response (frequency = km<sup>2</sup> for which response is predicted) for a, all forests, b, boreal forests, c, temperate forests and d, tropical forests. Error bars show cumulative frequency distributions for C-N responses based on the upper and lower bound of the 95% Confidence Interval.

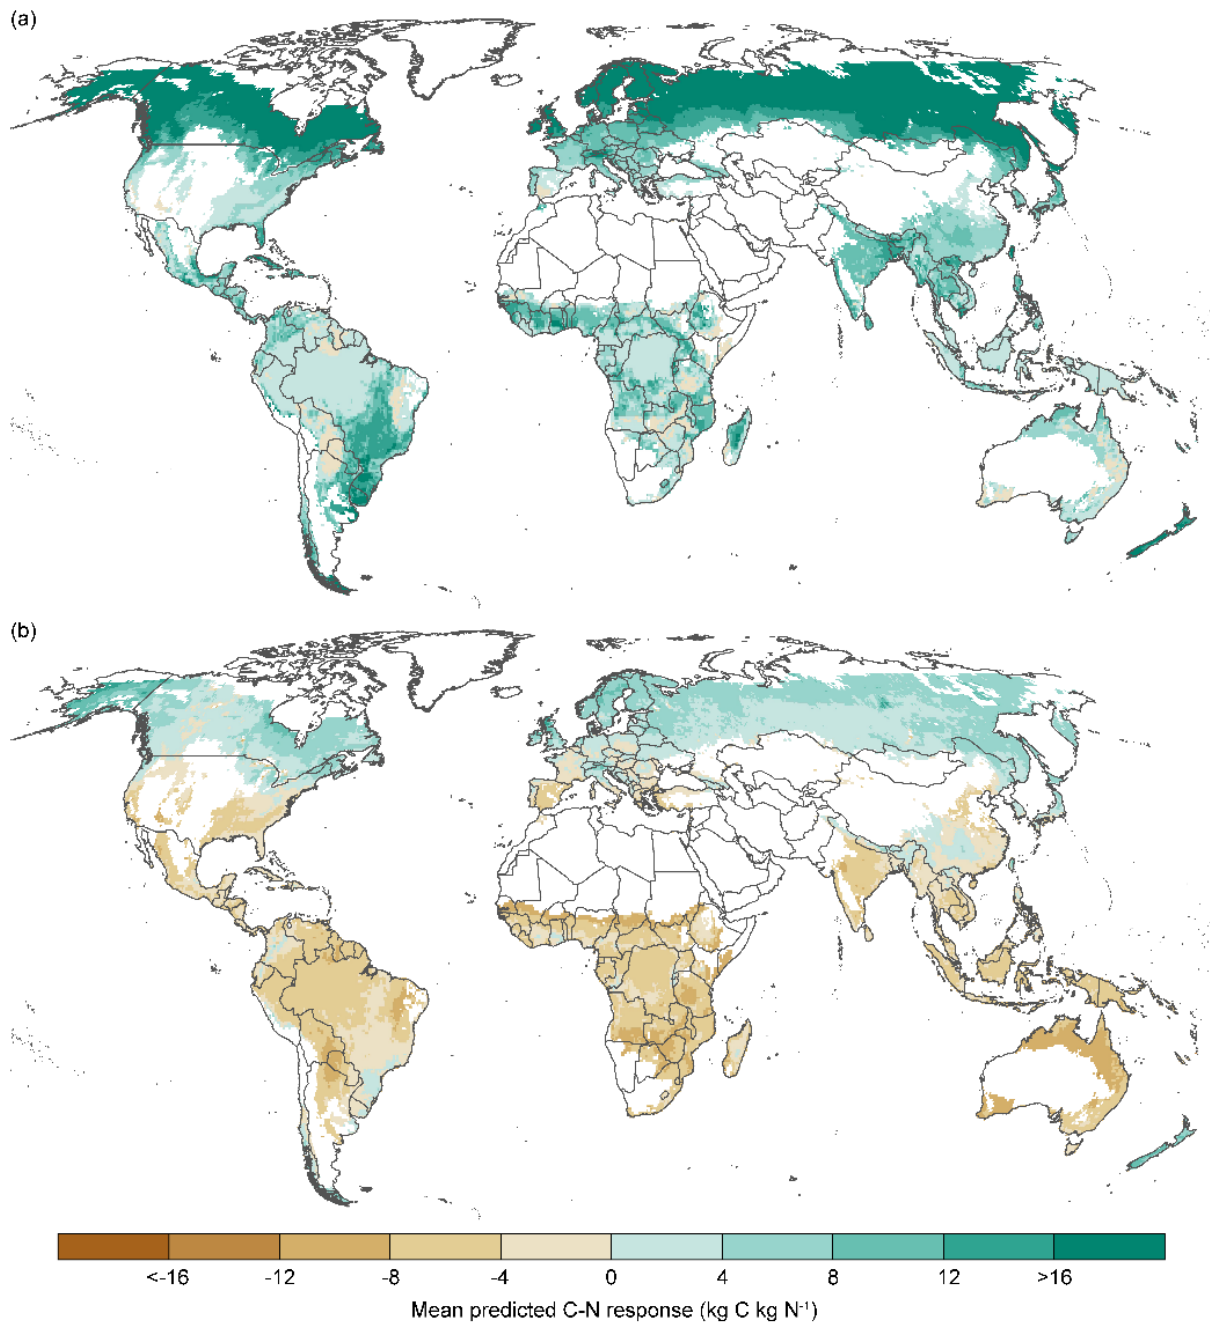

**Figure S5 a**, upper and b, lower boundaries of 95% CI for predicted C-N response, as shown in **Figure 1**.

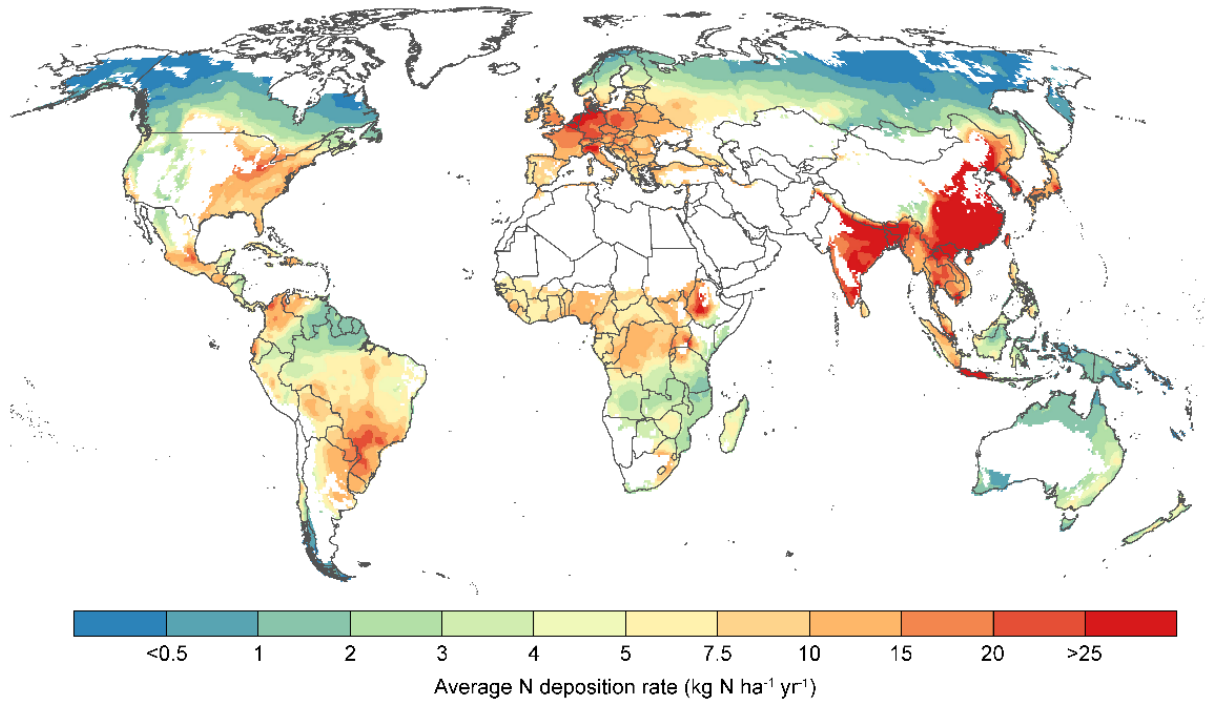

**Figure S6** N deposition to forests for the year 2010 used for estimating the N-induced C sink, data from Schwede et al. (2018). Grid cells with forest area <math><5\%</math> are masked.

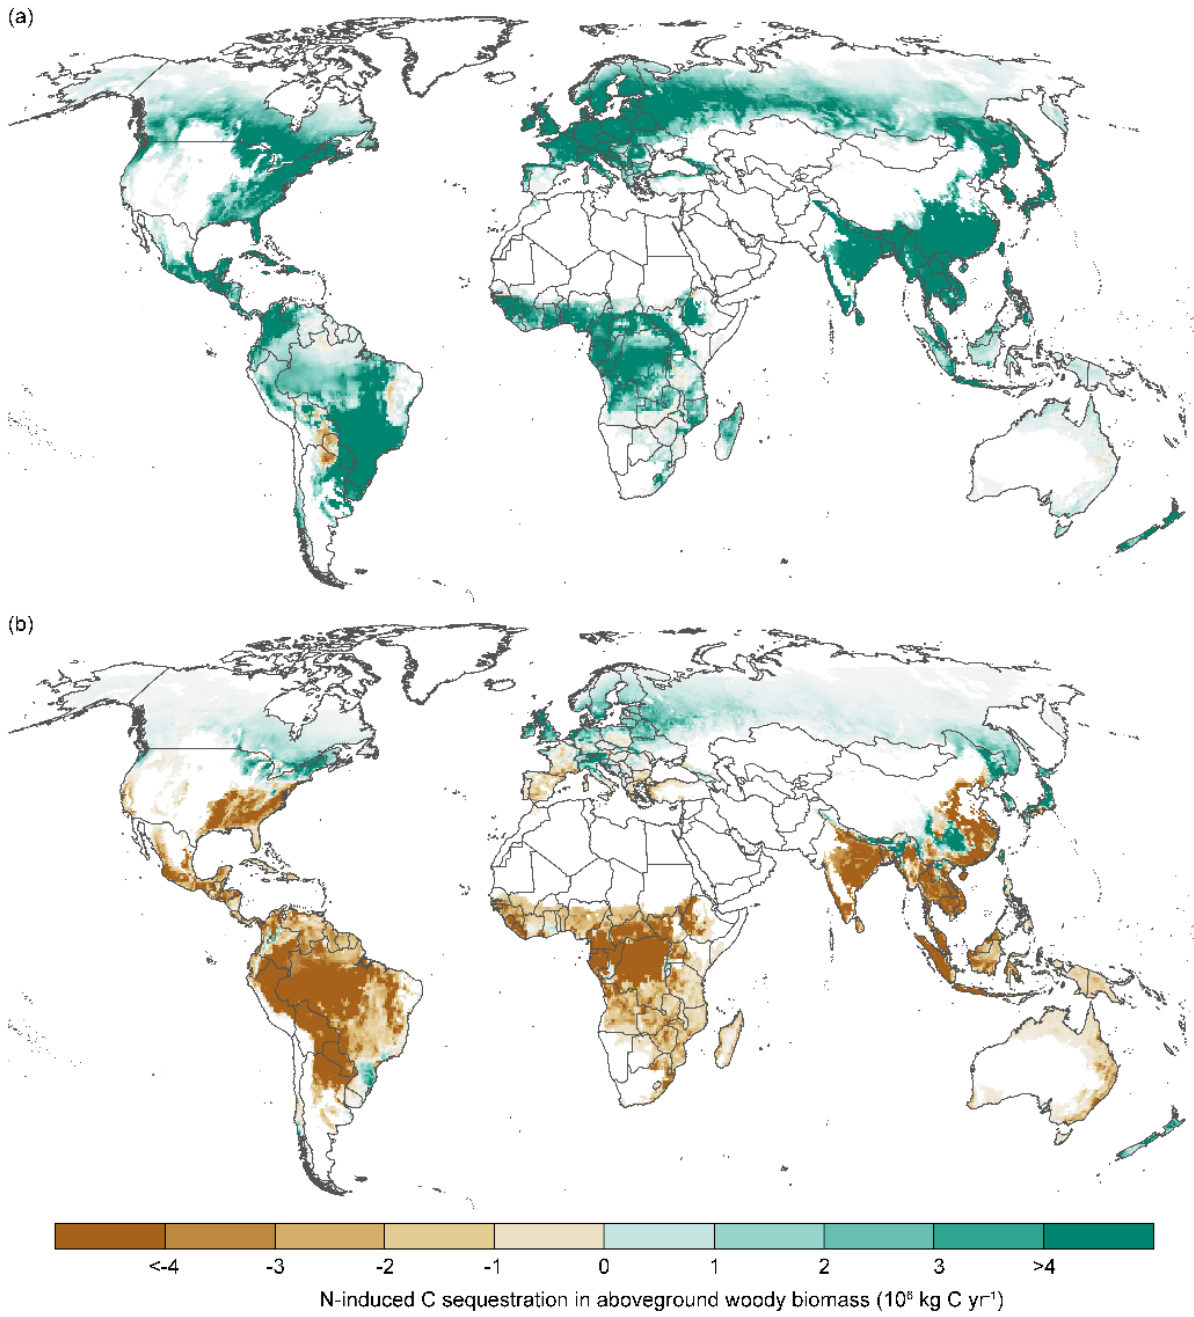

**Figure S7** a, upper and b, lower bound of 95% CI for N-induced C sequestration in forest aboveground woody biomass predicted by overlay of C-N responses with N deposition, as shown in **Figure 2a**.



### Boreal forests

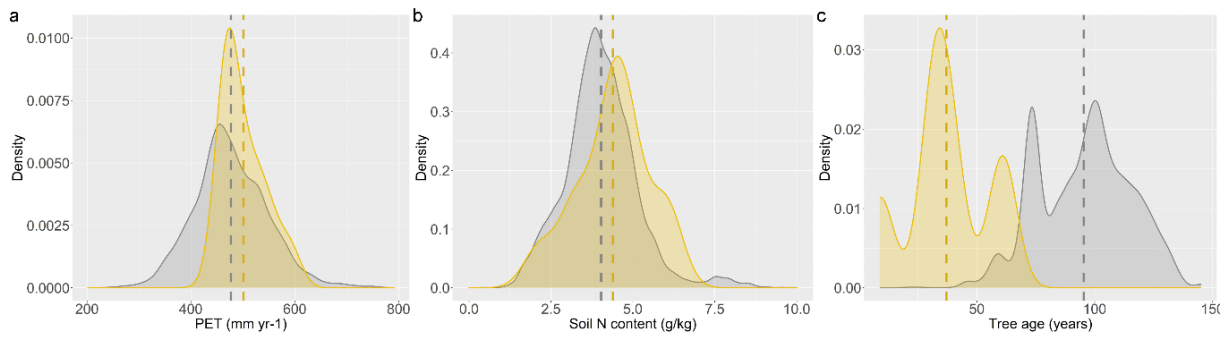

### Temperate forests

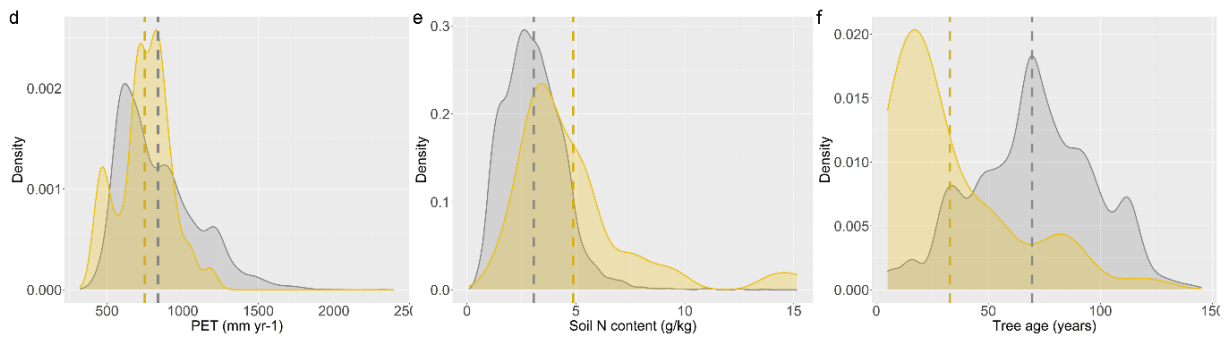

### Tropical forests

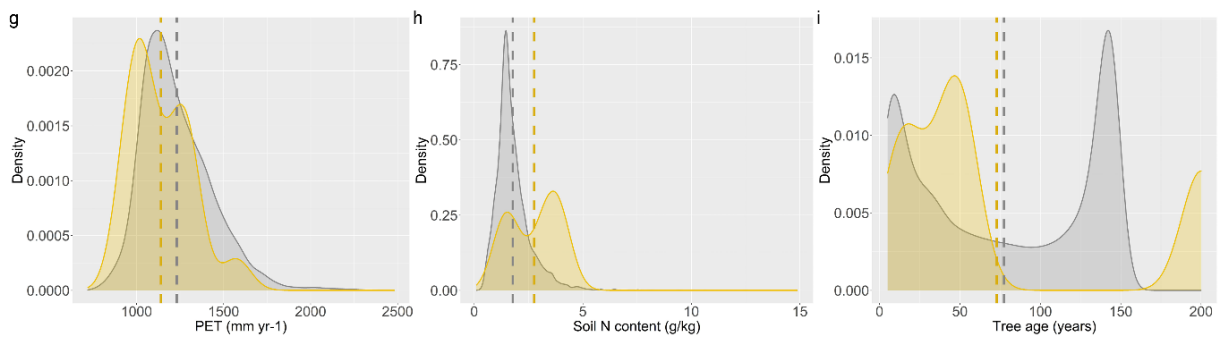

### All forests

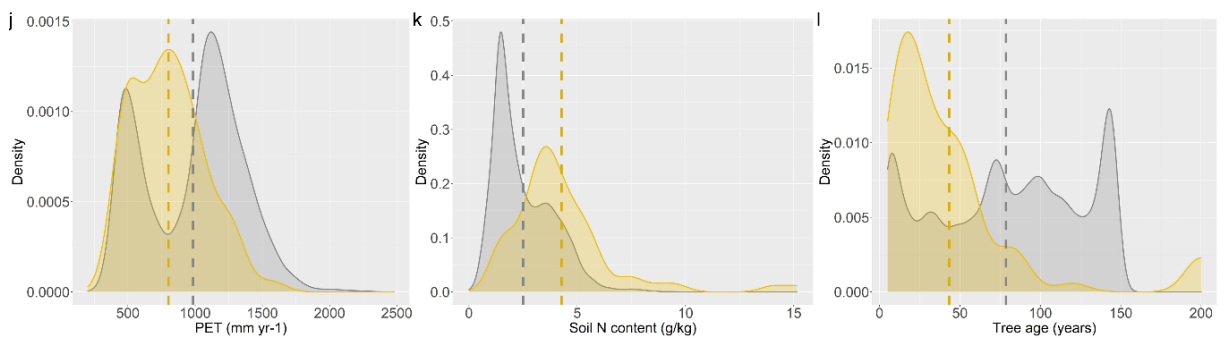

**Figure S8** Density plots showing the distribution of predictor variables (PET, soil N content and tree age) in the database (yellow) and in global forests (grey) for boreal forests (a–c), temperate forests (d–f), tropical forests (g–i) and for all forests (j–l). Dashed lines indicate the average value of the variable in the database (yellow) and in forests (grey). For the density plots showing distribution in the database, frequency refers to ‘number of observations’, while for the density plots showing distribution in global forests, frequency refers to ‘number of km<sup>2</sup> forest’.

## Supplementary Tables

**Table S1** Classification of WWF ecoregions (Olson et al., 2001) and aggregation to biome classification used in this study. Grid cells classified as ‘other’ based on WWF ecoregions were classified as either boreal, temperate or tropical based on FAO Global Ecological Zones (Figure S1b). The final biome delineation used in our study is shown in Figure S1a.

| Biome ID | WWF Ecoregion                                                | Biome classification for this study |
|----------|--------------------------------------------------------------|-------------------------------------|
| 1        | Tropical and subtropical moist broadleaf forests             | Tropical                            |
| 2        | Tropical and subtropical dry broadleaf forests               | Tropical                            |
| 3        | Tropical and subtropical coniferous forests                  | Tropical                            |
| 4        | Temperate broadleaf and mixed forests                        | Temperate                           |
| 5        | Temperate Coniferous Forest                                  | Temperate                           |
| 6        | Boreal forest / taiga                                        | Boreal                              |
| 7        | Tropical and subtropical grasslands, savannas and shrublands | Tropical                            |
| 8        | Temperate grasslands, savannas and shrublands                | Temperate                           |
| 9        | Flooded grasslands and savannas                              | Other                               |
| 10       | Montane grasslands and shrublands                            | Other                               |
| 11       | Tundra                                                       | Boreal                              |
| 12       | Mediterranean Forests, woodlands and scrubs                  | Temperate                           |
| 13       | Deserts and xeric shrublands                                 | Other                               |
| 14       | Mangroves                                                    | Tropical                            |
| 98       | Lakes                                                        | Other                               |
| 99       | Rock and ice                                                 | Other                               |

**Table S2** Results of the meta-regression for individual predictors of C-N response, including model intercept, coefficient with 95% CI, pseudo R2 (indicating the proportional reduction in the variance components of a model compared to a model with no moderators) and Akaike Information Criterion (AIC). \*\*\*= p<0.01; \*\*= p<0.05, \*=p<0.1

| Predictor variable      | Intercept | Coefficient | Lower-95% | Upper-95% | psR2 | AIC  |
|-------------------------|-----------|-------------|-----------|-----------|------|------|
| Log(age)                | 4.1***    | -0.21**     | -0.36     | -0.07     | 33.2 | 77.0 |
| log(NDEP)               | 3.4***    | -0.03       | -0.20     | 0.14      | 0.0  | 83.7 |
| log(NDEPcum)            | 3.5***    | -0.04       | -0.18     | 0.10      | 0.0  | 83.5 |
| Log(Nadd)               | 3.6***    | -0.15*      | -0.30     | 0.01      | 15.7 | 80.8 |
| log(PET)                | 8.7***    | -0.80***    | -1.14     | -0.46     | 56.3 | 69.2 |
| TEMP                    | 3.5***    | -0.02*      | -0.03     | 0.00      | 11.5 | 81.1 |
| log(PREC)               | 3.6***    | -0.04       | -0.21     | 0.13      | 0.0  | 84.8 |
| log(PE)                 | 3.3***    | 0.00        | -0.09     | 0.09      | 0.0  | 85.2 |
| log(CEC)                | 3.0***    | 0.09        | -0.15     | 0.34      | 0.0  | 83.7 |
| log(CLAY)               | 3.8***    | -0.19       | -0.43     | 0.06      | 18.1 | 82.1 |
| log(OC)                 | 2.9***    | 0.10        | -0.04     | 0.24      | 6.6  | 82.9 |
| Log(C:N)                | 3.1***    | -0.11       | -0.34     | 0.12      | 1.4  | 84.2 |
| log(SoilN)              | 1.7***    | 0.27***     | 0.09      | 0.46      | 22.1 | 76.9 |
| pH                      | 4.3***    | -0.20       | -0.50     | 0.09      | 10.9 | 82.6 |
| Absolute latitude (LAT) | 2.9***    | 0.01***     | 0.004     | 0.02      | 34.2 | 76.3 |

**Age** = average stand age at start of experiment (years), **NDEP** = ambient N deposition rate ( $\text{kg N ha}^{-1} \text{ yr}^{-1}$ , year 2010), **NDEPcum** = cumulative N deposition during 50 years prior to start of experiment ( $\text{kg N ha}^{-1}$ ), **Nadd** = average N addition rate during the experiment ( $\text{kg N ha}^{-1} \text{ yr}^{-1}$ ), **PET** = potential evapotranspiration ( $\text{mm yr}^{-1}$ ), **TEMP** = mean annual temperature (degree Celsius), **PREC** = mean annual precipitation ( $\text{mm yr}^{-1}$ ), **PE** = precipitation excess ( $\text{mm yr}^{-1}$ ), **CEC** = cation exchange capacity in 0–30cm, **CLAY** = soil clay content 0–30cm ( $\text{g kg}^{-1}$ ), **OC** = soil organic carbon content 0–30cm ( $\text{g kg}^{-1}$ ), **C:N** = soil C:N ratio 0–30cm (-), **SoilN** = soil N content 0–30cm ( $\text{g kg}^{-1}$ ), **pH** = soil pH 0–30cm, **LAT** = absolute latitude (degrees).

**Table S3** Share of global forest area in regions with a high confidence in positive C-N response ( $C-N > 0$ ,  $p < 0.05$ ), with a high confidence in a negative C-N response ( $C-N < 0$ ,  $p < 0.05$ ) and where the direction of the C-N response is uncertain, for different forest biomes.

|                                      | Boreal | Temperate | Tropical | Total |
|--------------------------------------|--------|-----------|----------|-------|
| Positive C-N response ( $p < 0.05$ ) | 21%    | 13%       | 2%       | 36%   |
| Negative C-N response ( $p < 0.05$ ) | 0%     | 0%        | 5%       | 5%    |
| Insignificant C-N response           | 0%     | 8%        | 51%      | 59%   |
| Total                                | 21%    | 21%       | 58%      | 100%  |

**Table S4** Forest area, total and average N deposition, average C-N response, and total and average N-induced C sequestration per forest biome as presented in Table 4, but using the classification of biomes according to FAO Global Ecological Zones (GEZ), see Figure S1b.

|              | Forest area<br>(km <sup>2</sup> x 10 <sup>6</sup> ) | Total N dep<br>(Tg yr <sup>-1</sup> ) | Average N dep<br>(kg ha <sup>-1</sup> yr <sup>-1</sup> ) | C-N response<br>(-) | Total C seq.<br>(Tg yr <sup>-1</sup> ) | Average C seq.<br>(kg ha <sup>-1</sup> yr <sup>-1</sup> ) |
|--------------|-----------------------------------------------------|---------------------------------------|----------------------------------------------------------|---------------------|----------------------------------------|-----------------------------------------------------------|
| Boreal       | 7.3                                                 | 1.3                                   | 1.8                                                      | 11 (4–20)           | 15 (5–26)                              | 19 (7–36)                                                 |
| Temperate    | 4.6                                                 | 4.3                                   | 9.3                                                      | 5 (1–9)             | 20 (4–40)                              | 44 (8–87)                                                 |
| Sub-tropical | 2.7                                                 | 4.5                                   | 16.7                                                     | 2 (-1–7)            | 10 (-6–29)                             | 37 (-22–109)                                              |
| Tropical     | 17.2                                                | 13.0                                  | 7.6                                                      | 0 (-4–5)            | -3 (-58–67)                            | -2 (-34–39)                                               |
| World        | 31.8                                                | 23.1                                  | 7.3                                                      | 2 (-2–7)            | 41 (-55–163)                           | 13 (-17–51)                                               |

**Table S5** Differences in estimated N-induced C sequestration between this study and Du and De Vries (2018), based on mean C-N response, N deposition and forest area per biome.

| Biome            | Study         | C-N response<br>(kg C kg N <sup>-1</sup> ) | N deposition<br>(kg N ha <sup>-1</sup> yr <sup>-1</sup> ) | Forest area<br>(ha x 10 <sup>7</sup> ) | N-induced C seq.<br>(Tg C yr <sup>-1</sup> ) |
|------------------|---------------|--------------------------------------------|-----------------------------------------------------------|----------------------------------------|----------------------------------------------|
| <b>Boreal</b>    | Du & De Vries | 14                                         | 2                                                         | 122                                    | 34                                           |
|                  | This study    | 11                                         | 2                                                         | 68                                     | 13                                           |
| <b>Temperate</b> | Du & De Vries | 5                                          | 12                                                        | 97                                     | 58                                           |
|                  | This study    | 4                                          | 10                                                        | 68                                     | 25                                           |
| <b>Tropical</b>  | Du & De Vries | 4                                          | 7                                                         | 187                                    | 52                                           |
|                  | This study    | 0                                          | 8                                                         | 183                                    | 3                                            |
| <b>Global</b>    | Du & De Vries |                                            | 7                                                         | 406                                    | 144                                          |
|                  | This study    |                                            | 7                                                         | 319                                    | 41                                           |
